# Supplementary material
Source: PubMed Central journal article supplement (PMC4128704)

Supplemental Figure 1

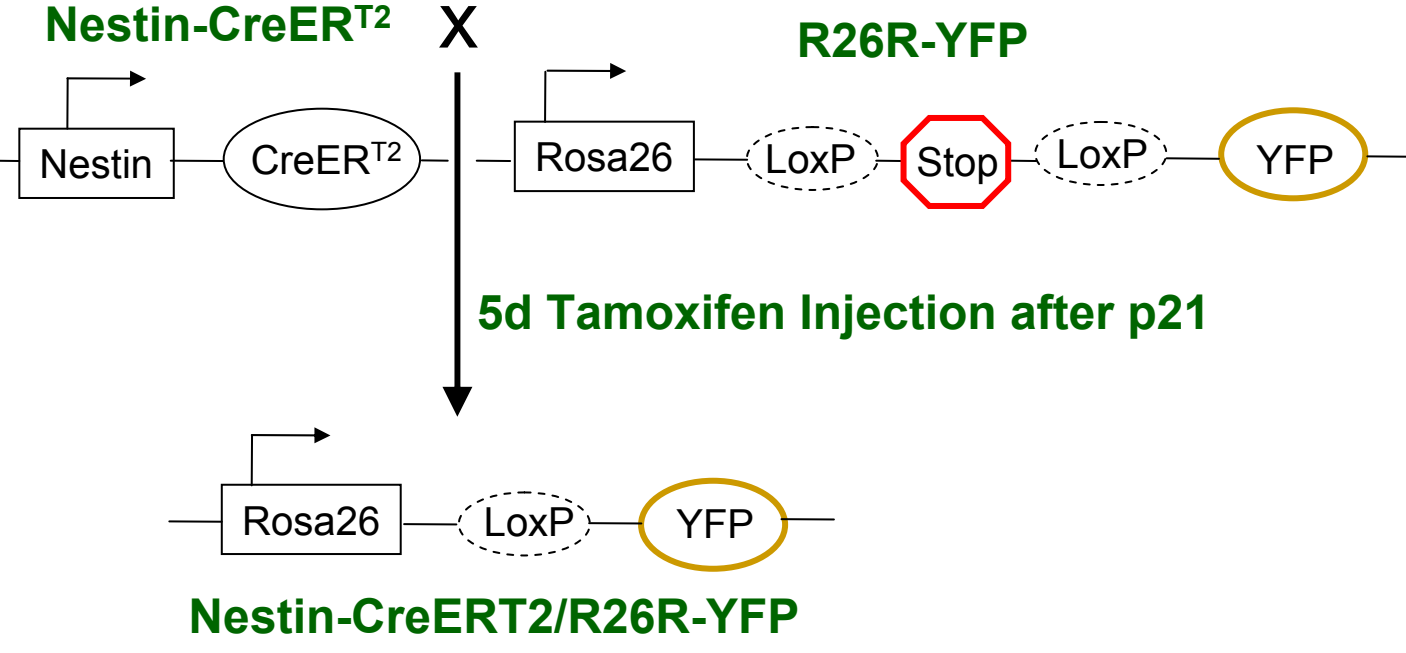

# Supplemental Figure 2

RMS

DCX

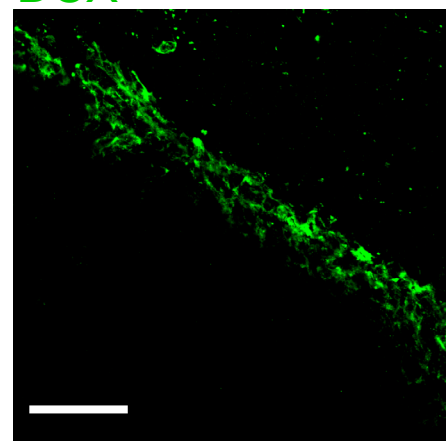

KCa3.1

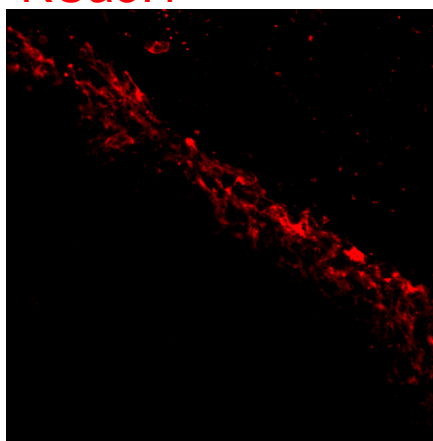

Merged + DAPI

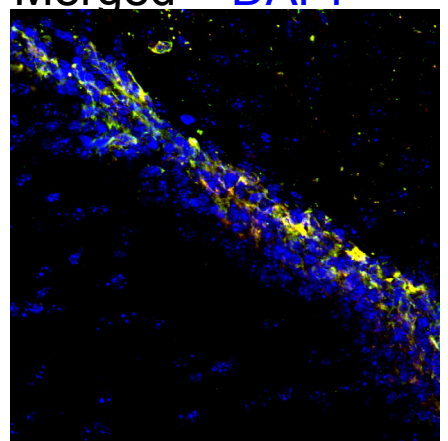

# Supplemental Figure 3

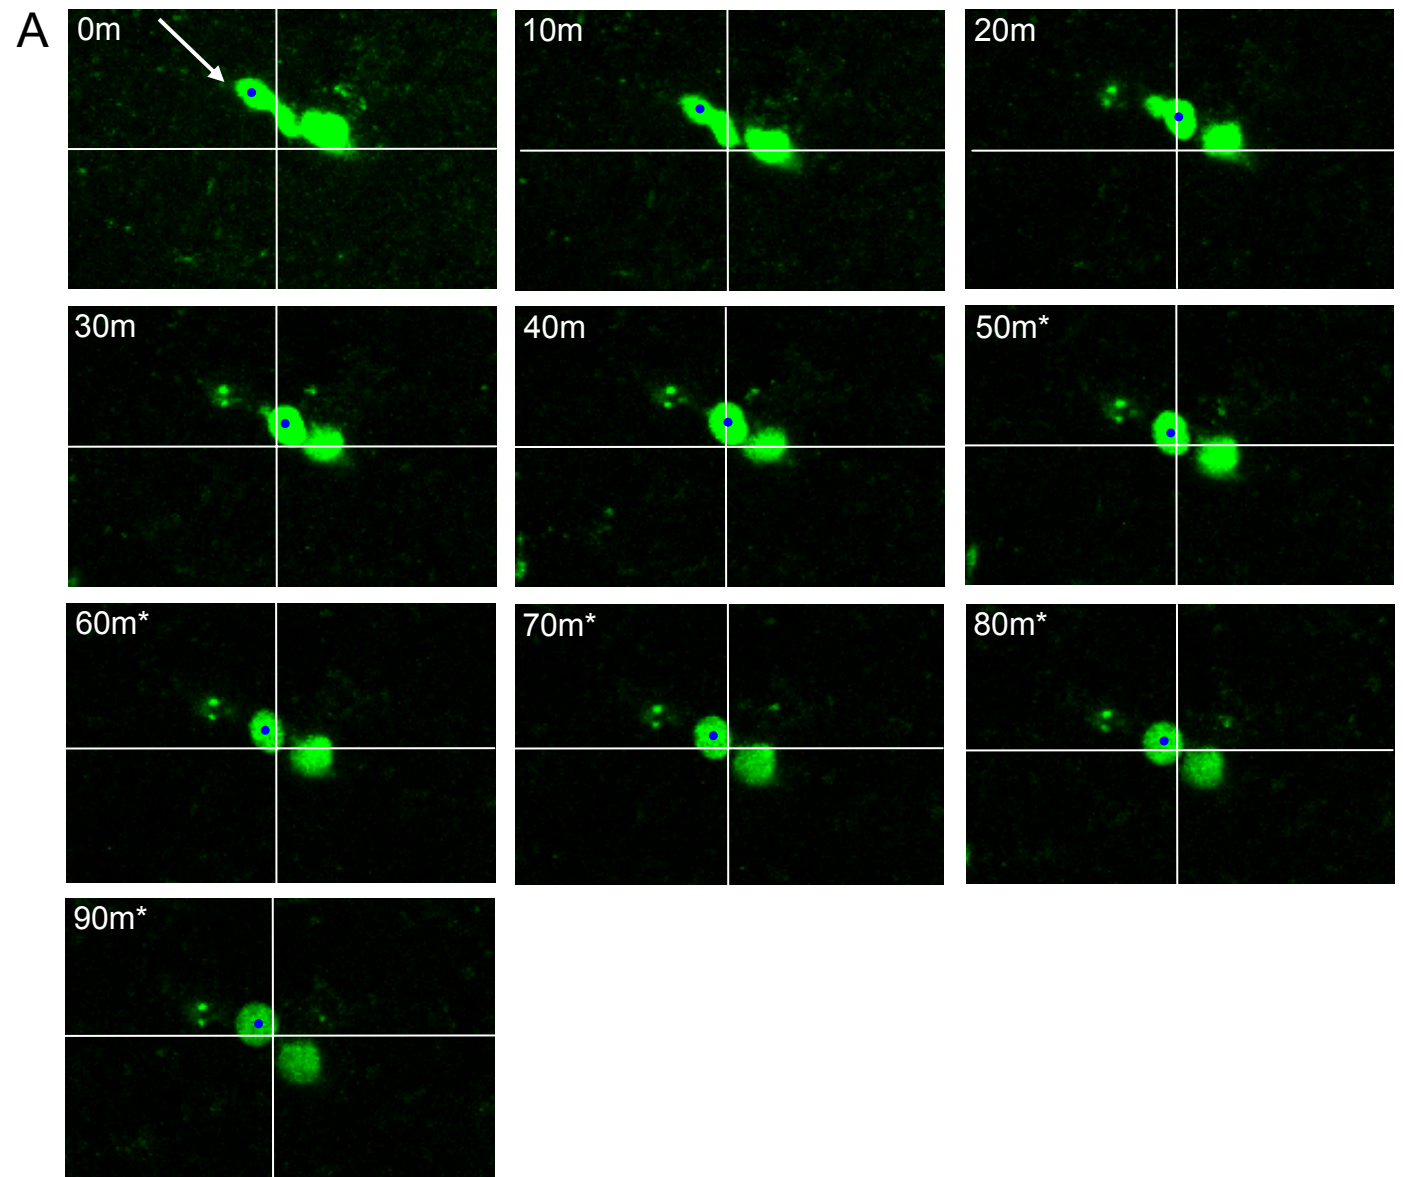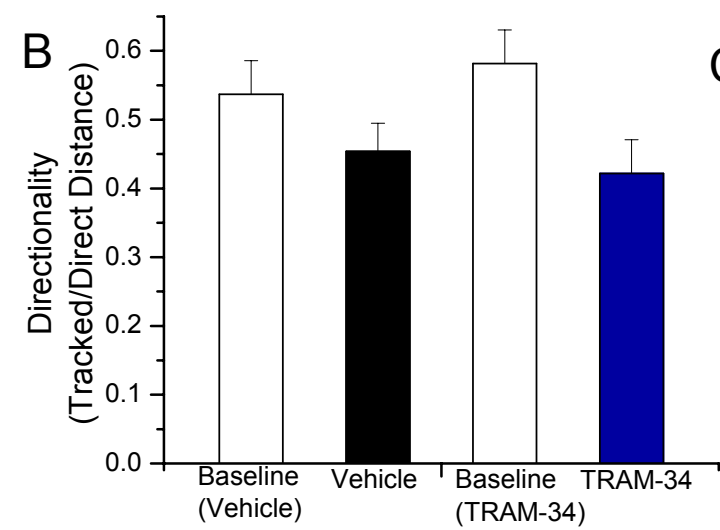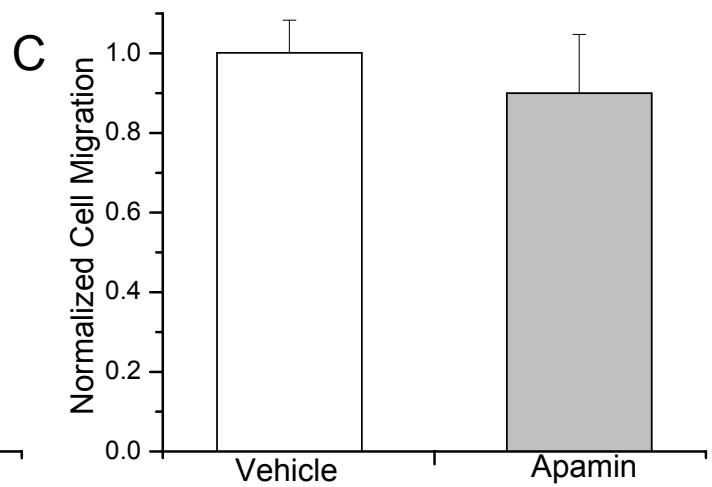

# Supplemental Figure 4

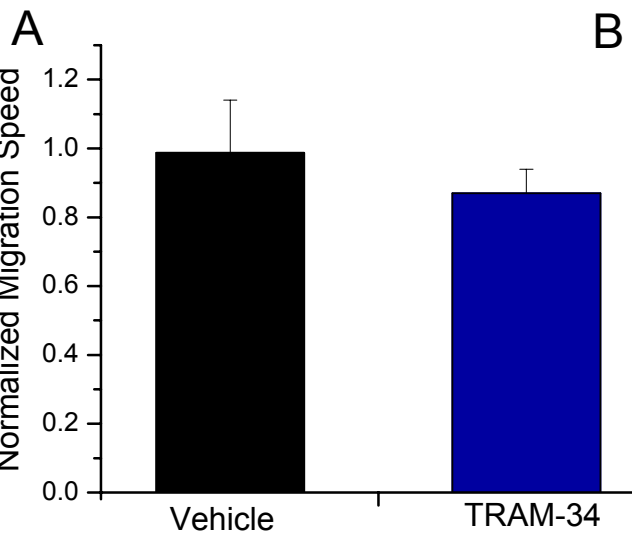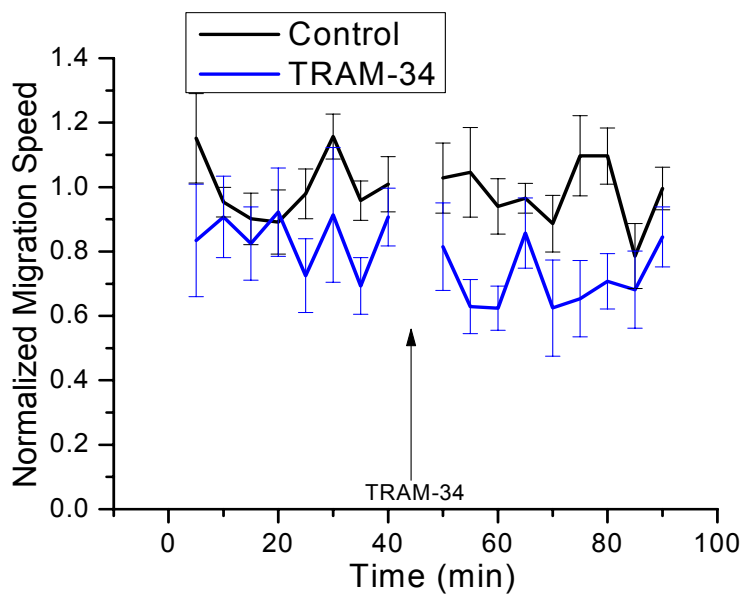

# Supplemental Figure 5

A

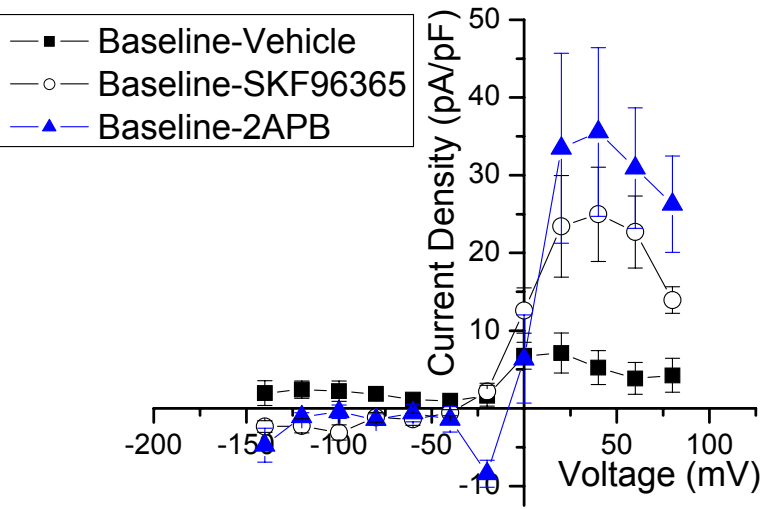

B

Calcium Inhibitor Subtractions

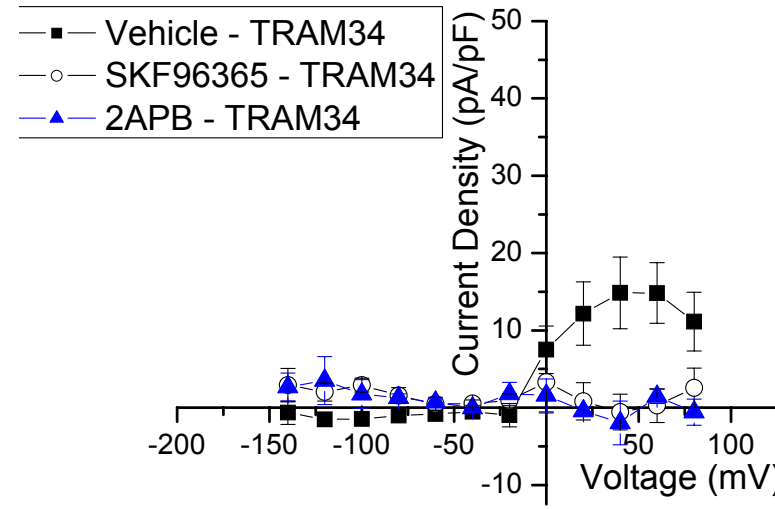

TRAM-34 Subtractions

# Supplemental Figure 6

A

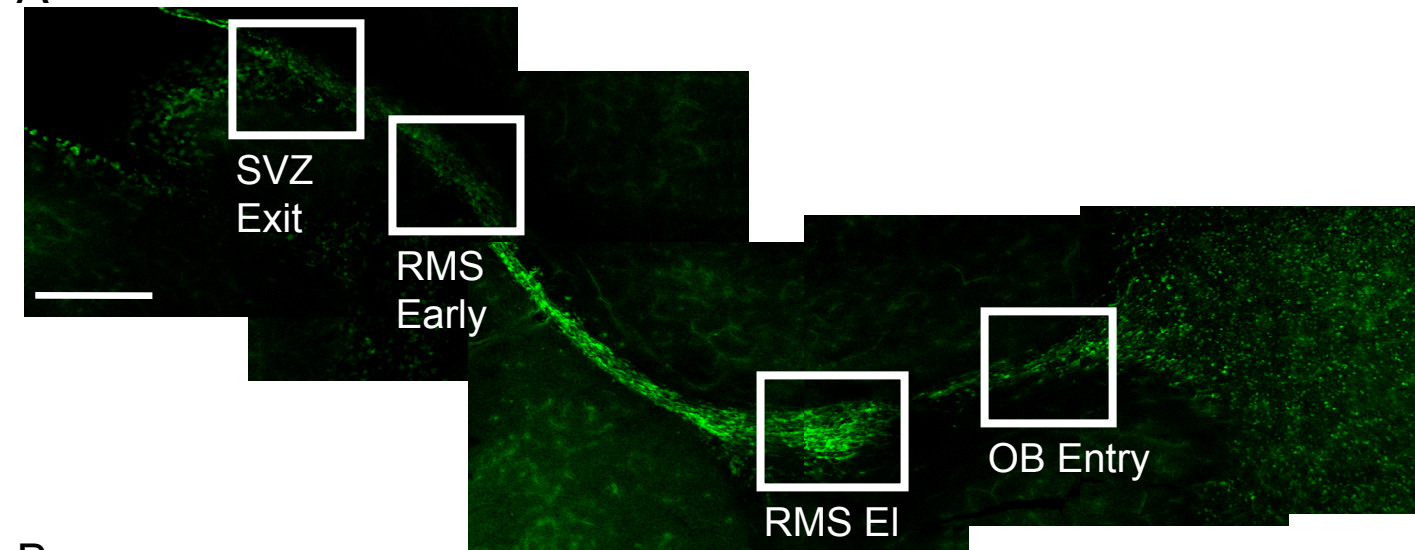

B

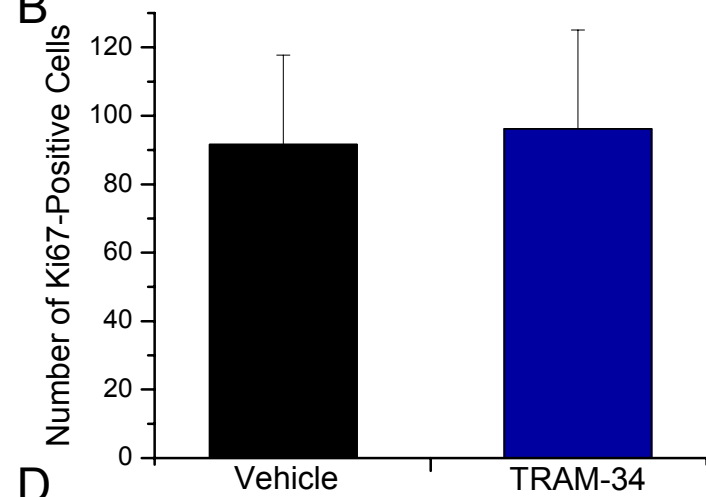

C

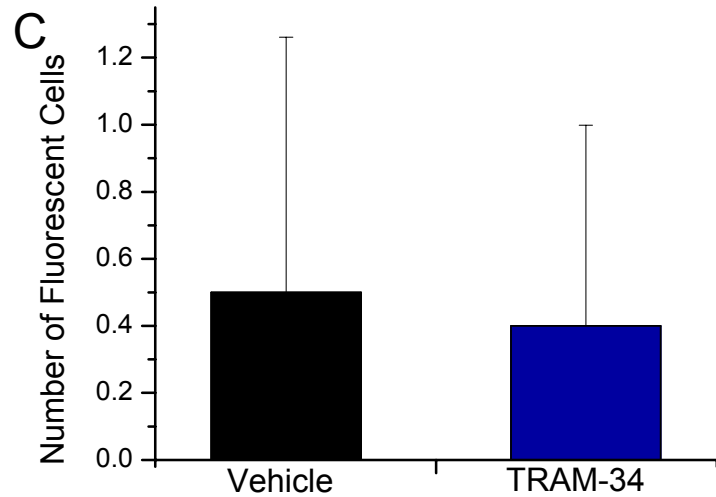

D

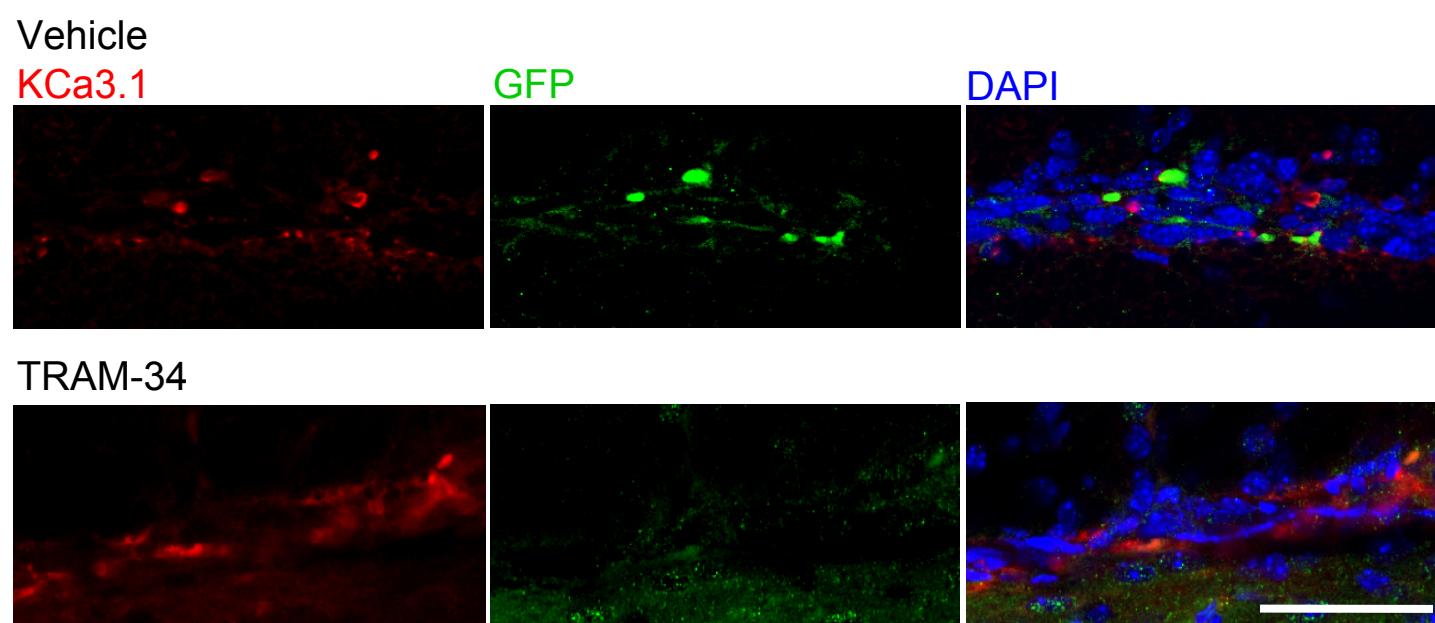

Supplement: supp_bht090_bht090supp_figures.pdf [file supp_bht090_bht090supp_figures.pdf]
